# Supplementary material
Source: publisher figshare collection journal article supplement (https://karger.figshare.com/ndownloader/files/33157586)
Supplement: Supplementary file 1 [file 33157586]

**A unique case report of infantile gliosarcoma with *TPR*-*NTRK1* fusion treated with larotrectinib**

Bruna Minniti Mançanoa*, Mariana Bisarro dos Reisb, Daniel Antunes Morenob, Flávia Escremim de Paulac, Carlos Roberto de Almeida Juniord, Carlos Eduardo Bezerra Cavalcantee, Maicon Fernando Zanonc, Iara Viana Vidigal Santanac,f, Marcus de Medeiros Matsushitaf, Rui Manuel Reisb,c,g,h*

aDepartament of Pediatric Oncology; Barretos Cancer Hospital, Barretos, Brazil;

bMolecular Oncology Research Center; Barretos Cancer Hospital, Barretos, Brazil;

cMolecular Diagnostic Laboratory; Barretos Cancer Hospital, Barretos, Brazil;

dDepartment of Pediatric Neurosurgery; Barretos Cancer Hospital, Barretos, Brazil;

eDepartment of Pediatric Radiology; Barretos Cancer Hospital, Barretos, Brazil;

fDepartment of Pathology, Barretos Cancer Hospital, Barretos, Brazil;

gLife and Health Sciences Research Institute (ICVS), Medical School, University of Minho, Braga, Portugal;

hICVS/3B’s-PT Government Associate Laboratory, Braga, Portugal.

***Corresponding authors:**

Bruna Minniti Mançano, MD, MSc

Department of Pediatric Neurosurgery

Barretos Cancer Hospital

Rua Antenor Duarte Vilela, 1331, Barretos, SP 14784-400, Brazil

Email: brunamancano@gmail.com

Telephone: +551798109-1977

- AND

Rui Manuel Reis, PhD

Molecular Oncology Research Center

Barretos Cancer Hospital

Rua Antenor Duarte Vilela, 1331, Barretos, SP 14784-400, Brazil

Email: ruireis.hcb@gmail.com

Telephone: + 551733216600 - Extension: 7090

| **Supplementary Table 1.** Gene targets of Oncomine Childhood Cancer Research Assay | | | | | | | | | | | | |  |  |  |
| --- | --- | --- | --- | --- | --- | --- | --- | --- | --- | --- | --- | --- | --- | --- | --- |
| **Comprehensive mutation coverage (86)** | | | |  | **Full exon coverage (44)** | | | **CNV (28)** | |  | **Fusion and expression (98)** | | | |  |
| *ABL1* | *EGFR* | *IL7R* | *PDGFRA* |  | *APC* | *NF1* |  | *ABL2* | *MDM4* |  | *ABL1* | *FOSB* | *MYH11* | *PLAG1* | *YAP1* |
| *ABL2* | *EP300* | *JAK1* | *PDGFRB* |  | *ARID1A* | *NF2* |  | *ALK* | *MET* |  | *ABL2* | *FUS* | *MYH9* | *RAF1* | *ZMYND11* |
| *ALK* | *ERBB2* | *JAK2* | *PIK3CA* |  | *ARID1B* | *PHF6* |  | *BRAF* | *MYC* |  | *AFF3* | *GLI1* | *NCOA2* | *RANBP17* | *ZNF384* |
| *ACVR1* | *ERBB3* | *JAK3* | *PIK3R1* |  | *ATRX* | *PRPS1* |  | *CCND1* | *MYCN* |  | *ALK* | *GLIS2* | *NCOR1* | *RARA* |  |
| *AKT1* | *ERBB4* | *KDM4C* | *PPM1D* |  | *CDKN2A* | *PSMB5* |  | *CDK4* | *PDGFRA* |  | *BCL11B* | *HMGA2* | *NOTCH1* | *RECK* | **Gene Expression** |
| *ASXL1* | *ESR1* | *KDR* | *PTPN11* |  | *CDKN2B* | *PTCH1* |  | *CDK6* | *PIK3CA* |  | *BCOR* | *JAK2* | *NOTCH2* | *RELA* | *BCL2* |
| *ASXL2* | *EZH2* | *KIT* | *RAF1* |  | *CEBPA* | *PTEN* |  | *EGFR* |  |  | *BCR* | *KAT6A* | *NOTCH4* | *RET* | *BCL6* |
| *BRAF* | *FASLG* | *KRAS* | *RET* |  | *CHD7* | *RB1* |  | *ERBB2* |  |  | *BRAF* | *KMT2A* | *NPM1* | *ROS1* | *FGFR1* |
| *CALR* | *FBXW7* | *MAP2K1* | *RHOA* |  | *CRLF1* | *RUNX1* |  | *ERBB3* |  |  | *CAMTA1* | *KMT2B* | *NR4A3* | *RUNX1* | *FGFR4* |
| *CBL* | *FGFR1* | *MAP2K2* | *SETBP1* |  | *DDX3X* | *SMARCA4* |  | *FGFR1* |  |  | *CCND1* | *KMT2C* | *NTRK1* | *SS18* | *IGF1R* |
| *CCND1* | *FGFR2* | *MET* | *SETD2* |  | *DICER1* | *SMARCB1* |  | *FGFR2* |  |  | *CIC* | *KMT2D* | *NTRK2* | *SSBP2* | *MET* |
| *CCND3* | *FGFR3* | *MPL* | *SH2B3* |  | *EBF1* | *SOCS2* |  | *FGFR3* |  |  | *CREBBP* | *LMO2* | *NTRK3* | *STAG2* | *MYCN* |
| *CCR5* | *FLT3* | *MSH6* | *SH2D1A* |  | *EED* | *SUFU* |  | *FGFR4* |  |  | *CRLF2* | *MAML2* | *NUP214* | *STAT6* | *MYC* |
| *CDK4* | *GATA2* | *MTOR* | *SMO* |  | *FAS* | *SUZ12* |  | *GLI1* |  |  | *CSF1R* | *MAN2B1* | *NUP98* | *TAL1* | *TOP2A* |
| *CIC* | *GNA11* | *MYC* | *STAT3* |  | *GATA1* | *TCF3* |  | *GLI2* |  |  | *DUSP22* | *MECOM* | *NUTM1* | *TCF3* |  |
| *CREBBP* | *GNAQ* | *MYCN* | *STAT5B* |  | *GATA3* | *TET2* |  | *IGF1R* |  |  | *EGFR* | *MEF2D* | *NUTM2B* | *TFE3* |  |
| *CRLF2* | *H3F3A* | *NCOR2* | *TERT* |  | *GNA13* | *TP53* |  | *JAK1* |  |  | *ETV6* | *MET* | *PAX3* | *TP63* |  |
| *CSF1R* | *HDAC9* | *NOTCH1* | *TPMT* |  | *ID3* | *TSC1* |  | *JAK2* |  |  | *EWSR1* | *MKL1* | *PAX5* | *TSLP* |  |
| *CSF3R* | *HIST1H3B* | *NPM1* | *USP7* |  | *IKZF1* | *TSC2* |  | *JAK3* |  |  | *FGFR1* | *MLLT10* | *PAX7* | *TSPAN4* |  |
| *CTNNB1* | *HRAS* | *NRAS* | *ZMYM3* |  | *KDM6A* | *WHSC1* |  | *KIT* |  |  | *FGFR2* | *MN1* | *PDGFB* | *UBTF* |  |
| *DAXX* | *IDH1* | *NT5C2* |  |  | *KMT2D* | *WT1* |  | *KRAS* |  |  | *FGFR3* | *MYB* | *PDGFRA* | *USP6* |  |
| *DNMT3A* | *IDH2* | *PAX5* |  |  | *MYOD1* | *XIAP* |  | *MDM2* |  |  | *FLT3* | *MYBL1* | *PDGFRB* | *WHSC1* |  |

| **Supplementary Table 2.** Gene targets of Archer® FusionPlex® Solid Tumor Kit | | | | | | | | |
| --- | --- | --- | --- | --- | --- | --- | --- | --- |
| **Fusion splicing or exon skipping** | | | | | | |  | **SNV or indel** |
| *AKT3* | *ERG* | *FGFR2* | *MSMB* | *NTRK3* | *PRKCA* | *TERT* |  | *BRAF* |
| *ALK* | *ESR1* | *FGFR3* | *MYB* | *NUMBL* | *PRKCB* | *TFE3* |  | *PDGFRA* |
| *ARHGAP26* | *ETV1* | *FGR* | *MUSK* | *NUTM* | *RAF1* | *TFEB* |  |  |
| *AXL* | *ETV4* | *INSR* | *NOTCH1* | *PDGFRA* | *RELA* | *THADA* |  |  |
| *BRAF* | *ETV5* | *MAML2* | *NOTCH2* | *PDGFRB* | *RET* | *TMPRSS2* |  |  |
| *BRD3* | *ETV6* | *MAST1* | *NRG1* | *PIK3CA* | *ROS1* |  |  |  |
| *BRD4* | *EWSR1* | *MAST2* | *NTRK1* | *PKN1* | *RSPO2* |  |  |  |
| *EGFR* | *FGFR1* | *MET* | *NTRK2* | *PPARG* | *RSPO3* |  |  |  |


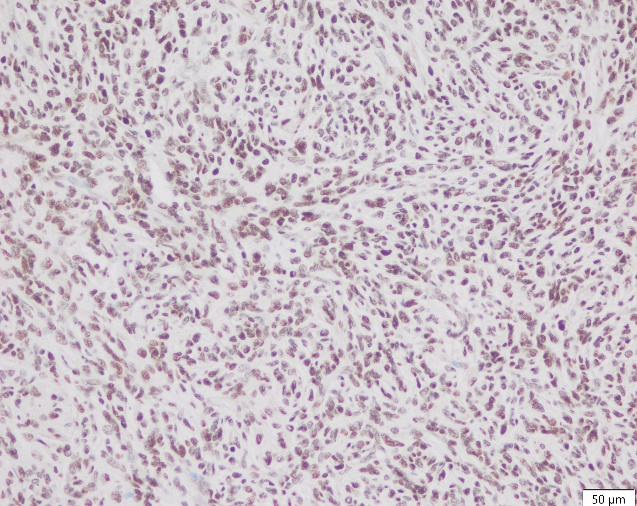


**Supplementary Figure 1:** Immunohistochemical staining of integrase interactor 1 (INI1) (Magnification 200X).

**Supplementary Table 3.** List of variants identified in the infantile gliosarcoma.

| **Chromosome** | **Position** | **Gene** | **Type** | **Referece allele** | **Variant allele** | **Depth** | **VAF %** | **Location** | **Exon** | **Consequence** | **Protein** | **c.DNA** | **Transcript** | **COSMIC** | **Clinvar** | **AMP Classification** | **Gnomad** | **ABraOM** |
| --- | --- | --- | --- | --- | --- | --- | --- | --- | --- | --- | --- | --- | --- | --- | --- | --- | --- | --- |
| 1 | 23885498 | *ID3* | SNV | T | C | 2000 | 51.50 | exonic | 2 | missense | p.Thr105Ala | c.313A>G | NM_002167.5 | NI | NI | Tier IV | 0.7984 | 0.853038 |
| 2 | 29416366 | *ALK* | SNV | G | C | 1997 | 99.85 | exonic | 29 | missense | p.Asp1529Glu | c.4587C>G | NM_004304.5 | Neutral | Benign | Tier IV | 0.4697 | 0.475369 |
| 2 | 29416572 | *ALK* | SNV | T | C | 1995 | 99.65 | exonic | 29 | missense | p.Ile1461Val | c.4381A>G | NM_004304.5 | Neutral | Benign | Tier IV | 0.9968 | 0.992611 |
| 4 | 55139771 | *PDGFRA* | SNV | T | C | 1999 | 47.42 | exonic | 10 | missense | p.Ser478Pro | c.1432T>C | NM_006206.6 | Neutral | Benign | Tier IV | 0.1534 | 0.152709 |
| 4 | 55972946 | *KDR* | SNV | A | G | 1561 | 46.70 | exonic | 11 | missense | p.Cys482Arg | c.1444T>C | NM_002253.3 | Pathogenic | Benign | Tier IV | 0.02304 | 0.027915 |
| 4 | 106155185 | *TET2* | SNV | C | G | 1025 | 52.59 | exonic | 3 | missense | p.Pro29Arg| | c.86C>G| | NM_001127208.2 | Pathogenic | Not povided | Tier IV | 0.06050 | 0.048440 |
| 5 | 112176756 | *APC* | SNV | T | A | 1693 | 99.47 | exonic | 16 | missense | p.Val1822Asp | c.5465T>A | NM_000038.6 | Neutral | Benign | Tier IV | 0.7965 | 0.821018 |
| 5 | 176517797 | *FGFR4* | SNV | C | T | 751 | 98.80 | exonic | 4 | missense | p.Pro136Leu | c.407C>T | NM_213647.3 | Neutral | Not reported | Tier IV | 0.7945 | 0.754516 |
| 6 | 41903782 | *CCND3* | SNV | A | C | 1995 | 100.00 | exonic | 5 | missense | p.Ser259Ala | c.775T>G | NM_001760.5 | Neutral | Not reported | Tier IV | 0.5471 | 0.565789 |
| 8 | 61654298 | *CHD7* | SNV | T | A | 1649 | 51.67 | exonic | 2 | missense | p.Ser103Thr | c.307T>A | NM_017780.4 | NI | Benign | Tier IV | 0.01231 | 0.018062 |
| 8 | 61778448 | *CHD7* | SNV | C | T | 1749 | 48.26 | exonic | 38 | missense | p.Leu2984Phe | c.8950C>T | NM_017780.4 | NI | Benign/Likely benign | Tier IV | 0.003887 | 0.000821 |
| 9 | 98209594 | *PTCH1* | SNV | G | A | 2000 | 89.90 | exonic | 23 | missense | p.Pro1315Leu | c.3944C>T | NM_000264.5 | Pathogenic | Benign | Tier IV | 0.3832 | 0.342365 |
| 17 | 7579472 | *TP53* | SNV | G | C | 1995 | 46.07 | exonic | 4 | missense | p.Pro72Arg | c.215C>G | NM_000546.5 | Neutral | Likely benign | Tier IV | 0.6629 | 0.675698 |
| 20 | 31022959 | *ASXL1* | SNV | T | C | 1999 | 100.00 | exonic | 12 | missense | p.Leu815Pro | c.2444T>C | NM_015338.6 | NI | NI | Tier IV | 1.000 | 1.000 |
| X | 76937963 | *ATRX* | SNV | G | C | 1994 | 99.95 | exonic | 9 | missense | p.Gln929Glu | c.2785C>G | NM_000489.5 | NI | NI | Tier IV | 0.3853 | 0.444112 |

Variant Allele Frequency (VAF), Not informed (NI)
